# Supplementary material
Source: MDPI journal article supplement (https://www.mdpi.com/2075-4701/8/1/17)
Supplement: s1 [file s1]

# Supplementary Materials: Synthesis of Metastable Au-Fe Alloy Using Ordered Nanoporous Silica as a Hard Template

Paskalis Sahaya Murphin Kumar, Thiripuranthagan Sivakumar, Takeshi Fujita, Ramasamy Jayavel, and Hideki Abe

## Content

|                                                                                                 |   |
|-------------------------------------------------------------------------------------------------|---|
| Synthetic procedures, characterization techniques and catalytic performance tests               | 2 |
| Figure S1: Scanning Electron Microscope (SEM) images of the nanoporous AuFe and Silica template | 3 |
| Figure S2: Hard X-ray Photoemission Spectroscopy (HAXPES) in a wide range of binding energy     | 4 |
| Figure S3: HAXPES in the Au 4f region                                                           | 5 |
| Figure S4: HAXPES in the Fe 2p region                                                           | 6 |
| Figures S5 and S6: Energy-dispersion Spectroscopy (EDS) analyses on the nanoporous Au-Fe        | 7 |

## Synthetic procedures

Reagents used for the synthesis were used as purchased without further purification: anhydrous Au(III) chloride ( $\text{AuCl}_3$ , Aldrich), iron acetylacetonate ( $\text{Fe(II)acac}$ , Aldrich), diethylene glycol dimethyl ether (anhydrous, 99.5%, Aldrich),  $\text{LiBH(C}_2\text{H}_5)_3$  (super-hydride, 1M in THF, Aldrich), hexane (anhydrous, 95%, Aldrich), poly (ethylene glycol)-block-poly(propylene glycol)-blockpoly(ethylene glycol) ( $\text{EO}_{20}\text{PO}_{70}\text{EO}_{20}$ , average molecular weight 5800, Aldrich).

In a typical synthesis of SBA-15 (reported by Vinu et al [17]) as illustrated below: 4 g of the amphiphilic triblock copolymer was dispersed in water (30 g) and HCl solution (120 mL, 2 M) and stirred for 5 h. Thereafter, tetraethylorthosilicate (TEOS, 9 g) was added to the homogeneous solution under stirring. The collected gel was aged at 40 °C for 24 h and finally heated to 100 °C for 24 h. After that, the synthesized solid was calcined in flowing air at 540 °C to decompose the triblock copolymer.

## Characterization

**Powder X-ray diffractometry (pXRD):** The pXRD measurements were performed using Cu K $\alpha$  radiation ( $\lambda = 0.15418$  nm; X'Pert Powder Diffractometer, Panalytical) with an increment of 0.02 degrees in a range of diffraction angles from 10 to 90 degrees. An obliquely finished Si crystal (non-reflection Si plate) was used as a sample holder to minimize the background.

**Hard X-ray photoemission spectroscopy (HAXPES):** HAXPES measurements were performed using X-rays with a photon energy of 5.95 keV, at the undulator beamline BL15XU of SPring-8, Japan. The core-level states of the samples were examined at room temperature in UHV using a hemispherical electron energy analyzer (VG SCIENTA R4000). The total energy resolution was set to 220 meV. The binding energy was referenced to the Fermi edge of an Au thin film.

**Transmission electron Microscopy:** We used a 200kV transmission electron microscope (TEM and/or STEM, JEM-2100F, JEOL) equipped with two aberration correctors (CEOS GmbH) for the image- and probe-forming lens systems and an X-ray energy-dispersive spectrometer (JED-2300T, JEOL) for elemental mapping. The samples for TEM were prepared by dropping an ethanol suspension of the sample powder onto a commercial copper TEM grid coated with a collodion film. The sample was thoroughly dried in vacuum prior to observation.

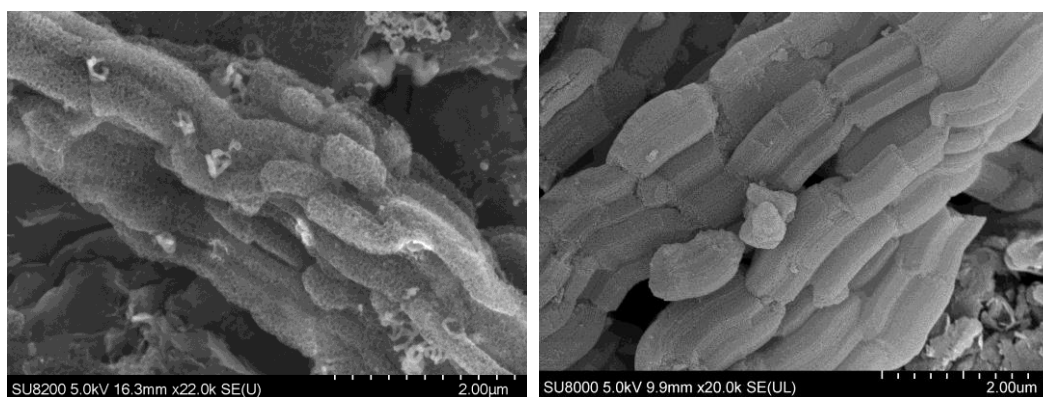

**Figure S1.** SEM images of the prepared nanoporous AuFe (left) and silica template (right).

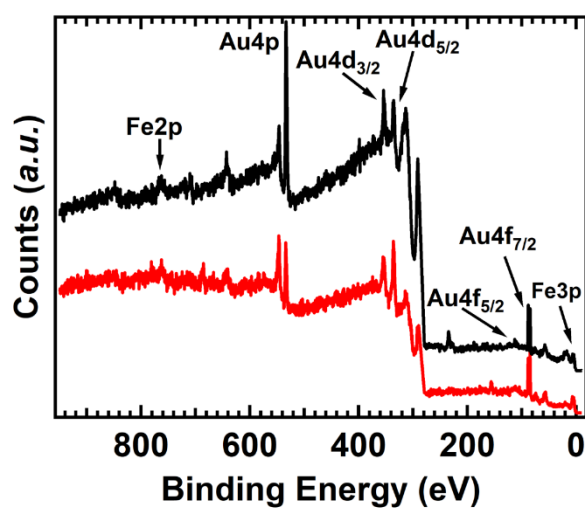

**Figure S2.** Hard X-ray photoemission spectroscopy (HAPES) profiles of the nanoporous Au-Fe (red) and AuFe nanoparticles (black) in a wide range of binding energy.

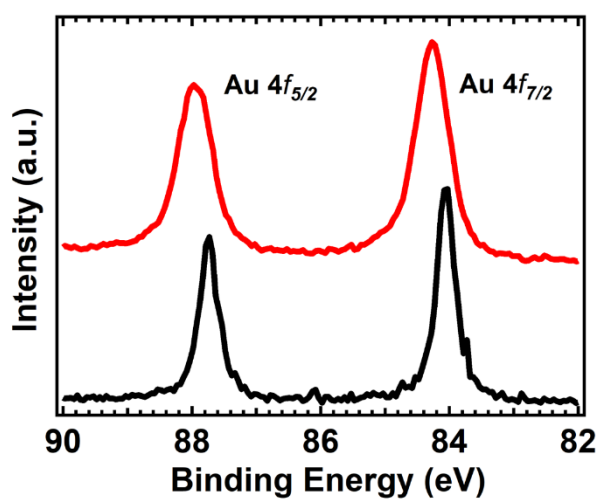

**Figure S3.** Hard X-ray photoemission spectroscopy (HAPES) profiles of the nanoporous Au-Fe (red) and Au nanoparticles (black) in the Au 4f region.

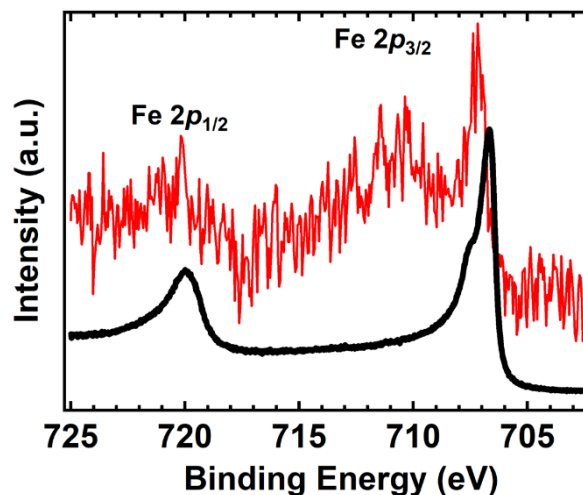

**Figure S4.** Hard X-ray photoemission spectroscopy (HAPES) profiles of the nanoporous Au-Fe (red) and Fe powder (black) in the Fe 2p region.

The Au to metallic Fe (Fe<sup>0</sup>) ratio was determined from Figures 2S-24:

The XPS peak area for the Au 4f<sub>7/2</sub> emission = 11090 ± 1100.

The cross section for the Au 4f<sub>7/2</sub> emission = 1.614.

The Au 4f<sub>7/2</sub> peak area/cross section = 11090/1.614 = 6870 ± 690.

The XPS peak area for the Fe<sup>0</sup> 2p<sub>1/2</sub> emission = 11435 ± 1100.

The cross section for the Fe<sup>0</sup> 2p<sub>1/2</sub> emission = 4.026 [1].

The Fe<sup>0</sup> 2p<sub>1/2</sub> peak area/cross section = 11435/4.026 = 2840 ± 280.

The Au/Fe<sup>0</sup> ratio = 6870/2840 = 2.42 ± 0.24.

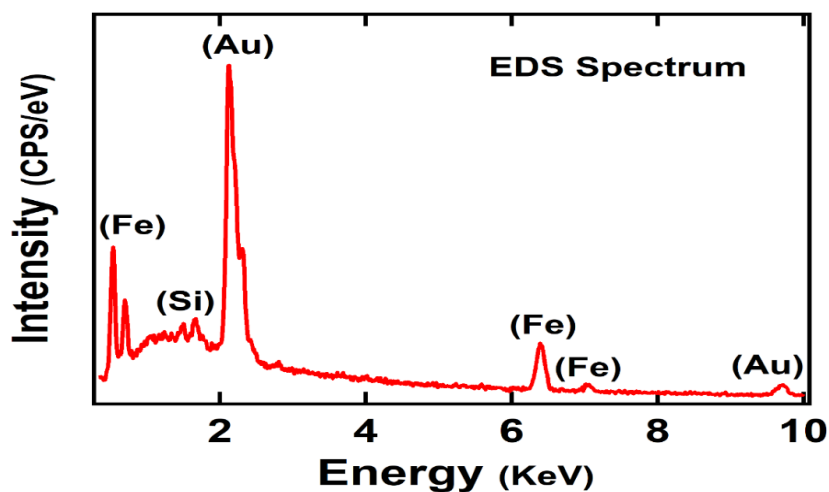

**Figure S5.** Energy dispersive spectroscopy (EDS) profile for the nanoporous Au-Fe.

**Table S1.** Chemical composition of the nanoporous Au-Fe determined by EDS.

| Element | Line type | Wt%    | Wt% Sigma | Atomic % |
|---------|-----------|--------|-----------|----------|
| Si      | K Series  | 2.12   | 0.23      | 0.49     |
| Fe      | K Series  | 27.13  | 0.81      | 57.75    |
| Au      | M Series  | 70.75  | 0.82      | 41.76    |
| Total   | -         | 100.00 | -         | -        |
